# Supplementary material for: Effects of individual micronutrients on blood pressure in patients with type 2 diabetes: a systematic review and meta-analysis of randomized clinical trials
Source: PubMed Central journal article supplement (PMC5233957; doi:10.1038/srep40751), 2017-01-13
Supplement: srep40751-s1.pdf [file srep40751-s1.pdf]

**Effect of individual micronutrients on blood pressure in type 2 diabetes: systematic review and meta-analysis of randomized clinical trials.**

**Authors:** Tatiana P. de Paula, RD, PhD<sup>1</sup>, Caroline K. Kramer, MD, PhD<sup>2</sup>, Luciana V. Viana, MD, PhD<sup>1</sup>, Mirela J. Azevedo, MD, PhD<sup>1</sup>

## SUPPLEMENTARY INFORMATION

("Micronutrients"[Mesh]) OR ("Phosphorus"[Mesh] OR "Phosphorus, Dietary"[Mesh] ) OR ("Sodium"[Mesh] OR "Sodium, Dietary"[Mesh])) OR "Chromium"[Mesh] OR "Calcium"[Mesh] OR ("Iron"[Mesh] OR "Iron, Dietary"[Mesh])) OR ("Magnesium"[Mesh] OR "Magnesium Chloride"[Mesh])) OR ("Potassium"[Mesh] OR "Potassium, Dietary"[Mesh])) OR ("Vitamins"[Mesh] OR "Vitamin B Complex"[Mesh] ) OR "Vitamin A"[Mesh] OR "Ascorbic Acid"[Mesh] OR "Vitamin B 6"[Mesh] OR "Vitamin B 12"[Mesh] OR "Vitamin D"[Mesh] OR "Vitamin E"[Mesh] OR "Zinc"[Mesh] OR "Carbohydrates"[Mesh] OR "Proteins"[Mesh] OR "Lipids"[Mesh] OR "Dietary Fiber"[Mesh] OR "Ethanol"[Mesh] OR "Alcohols"[Mesh] OR "Alcohol Drinking"[Mesh] OR ("Cholesterol"[Mesh] OR "Cholesterol, Dietary"[Mesh])) OR Fish oil OR Fatty acids OR omega-3 OR omega 6 OR Tea OR cocoa OR chocolate AND "Blood Pressure"[Mesh] OR "Hypertension"[Mesh] AND "Diabetes Mellitus"[Mesh].

Online-only Supplementary Medline search strategy:

## Vitamin C: systolic and diastolic BP

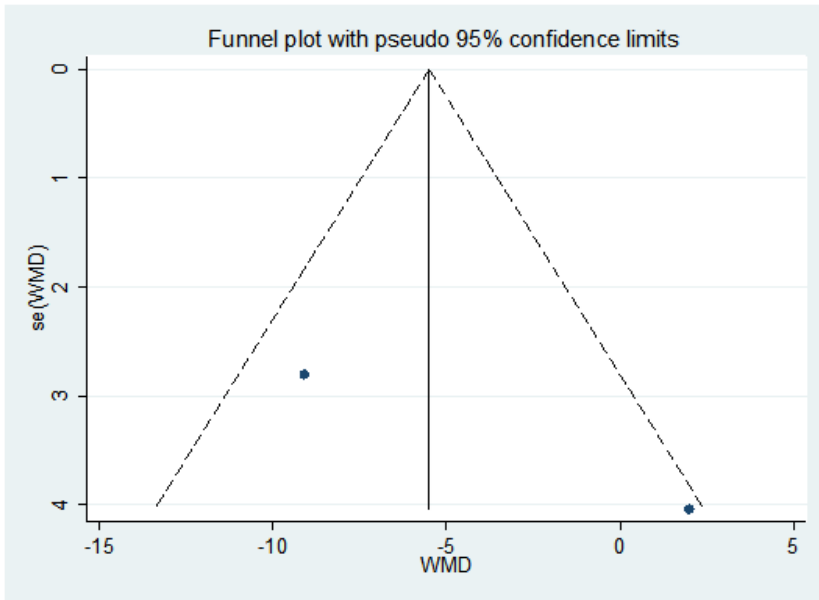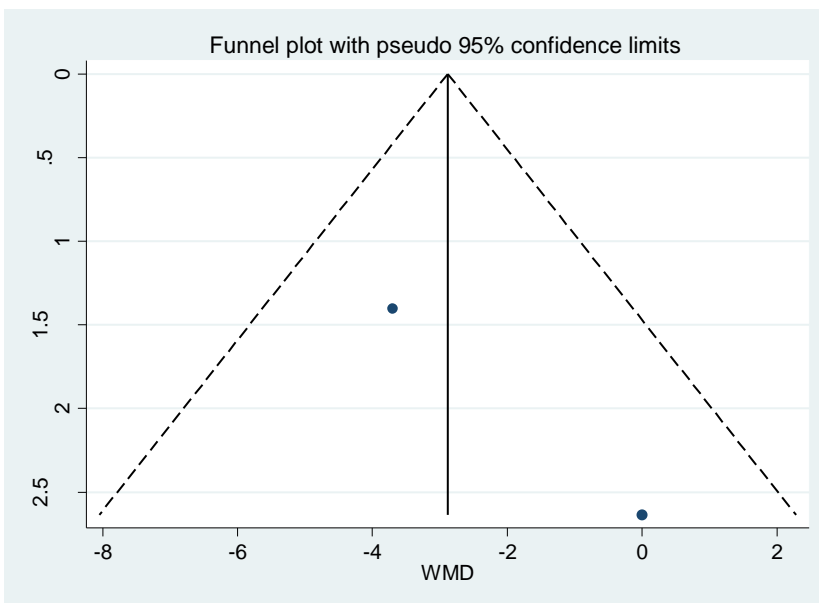

## B) Vitamin D: systolic and diastolic BP

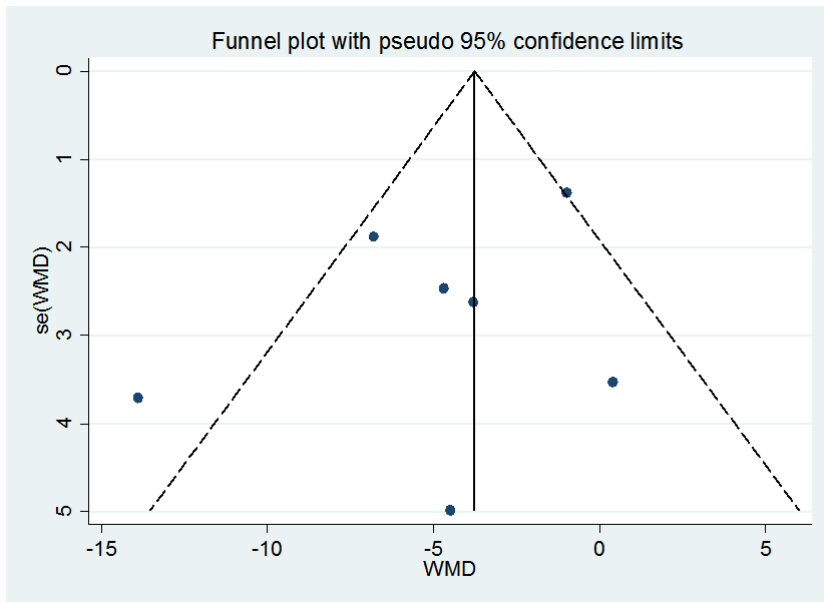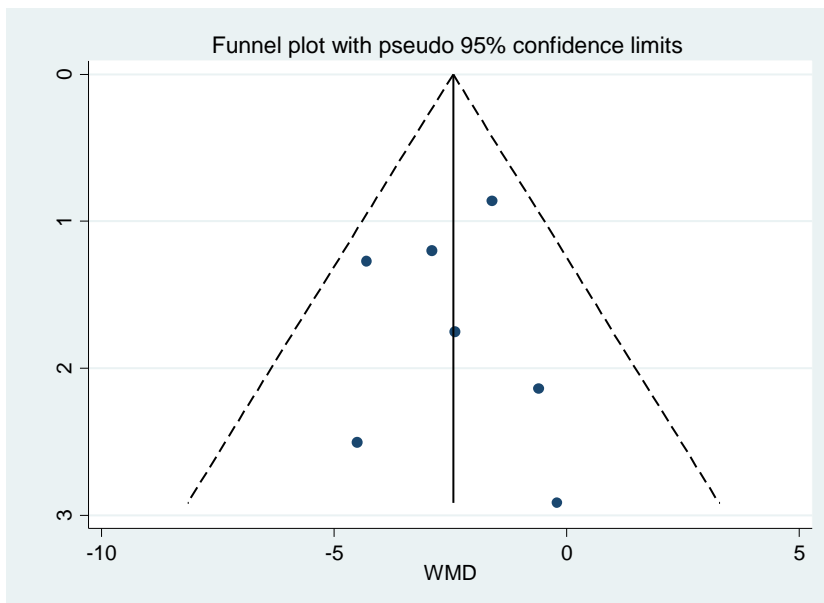

Funnel plots diagram of publication bias of the meta-analyses of the effect of individual micronutrients on blood pressure in type 2 diabetes: systematic review and meta-analysis of randomized clinical trials. A) vitamin C and B) vitamin D.

BP = blood pressure
